# Supplementary material
Source: PubMed Central journal article supplement (PMC10617522)

# Characterisation of integrated Marek Disease Virus genomes supports a model of integration by homology directed recombination and telomere-loop driven excision.

Wood *et al*

## Supplementary Figure 1.

STELA of iMDV associated telomeres in six avian cell lines.

A). Southern-STELA blots of iMDV associated telomeres amplified from six MDV positive cell lines using MD704R and STELA primers. Amplified telomeres were detected using radiolabelled (TTAGGG)<sub>n</sub> probes. The DNA input per STELA reaction was adjusted for each cell line based on the MDV copy number. B). Distribution plots of STELA amplicon lengths measured in each avian cell line. Length of the flanking sequence between MD704R primer site and the start of mTMR was subtracted from STELA product lengths. Average iMDV associated telomere lengths have not been estimated from the STELA data because telomeres at many chromosome ends in avian cells are beyond the amplification limit of PCR.

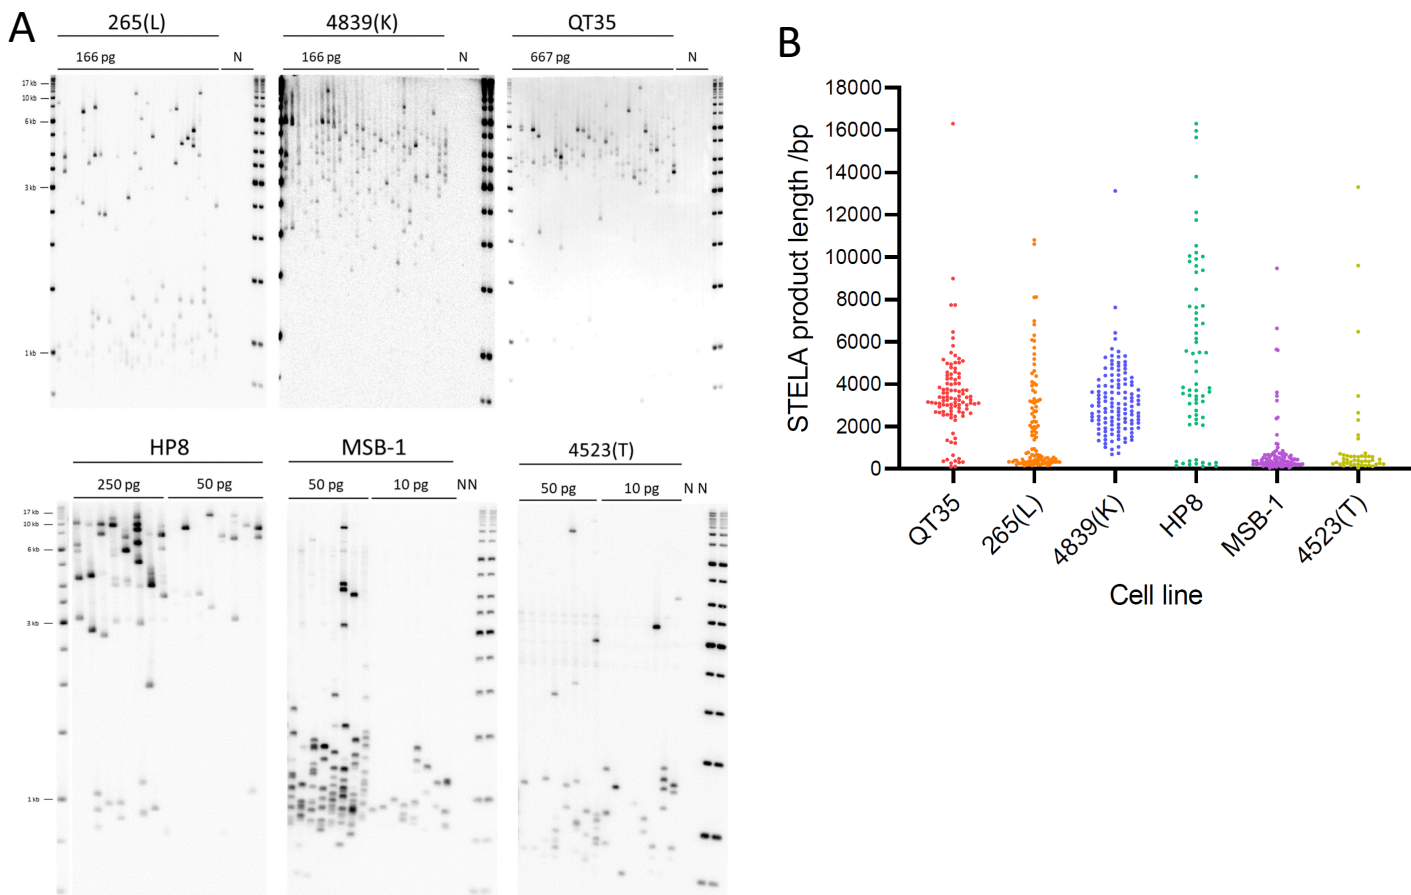

Supplement: jvi.00716-23-s0001.pdf [file jvi.00716-23-s0001.pdf]
